# Supplementary material
Source: HighWire-hosted journal article supplement (https://qualitysafety.bmj.com/content/27/4/308)
Supplement: inline-supplementary-material-1 [file inline-supplementary-material-1.docx]

**Supplement 1 – Medline search syntax with results from 1.9.17**

| **Medline final search – 1.9.17**  1. exp Pharmacists/ or pharmacis*.mp. 30516  2. exp Pharmacy/ or pharmacy.mp. 55892  3. exp Community Pharmacy Services/ or community pharm*.mp. 6731  4. Pharmacists' Aides/ or pharmacy technician.mp. 723  5. exp Community Pharmacy Services/ 3942  6. medication reconciliation.mp. or exp Medication Reconciliation/ 1355  7. medicines reconciliation.mp. 46  8. medication therapy management.mp. or exp Medication Therapy Management/ 1791  9. exp Medication Errors/ or medication erro*.mp. 16543  10. patient compliance.mp. or exp Patient Compliance/ 76858  11. medication discrepancy.mp. 59  12. medication discrepancies.mp. 215  13. medication adherence.mp. or exp Medication Adherence/ 19068  14. medication compliance.mp. 1420  15. medication counselling.mp. 62  16. medical history taking.mp. or exp Medical History Taking/ 20931  17. Medication review.mp 822  18. (medication adj3 reconciliation).mp. [mp=title, abstract, original title, name of substance word, subject heading word, keyword heading word, protocol supplementary concept word, rare disease supplementary concept word, unique identifier] 1378  19. patient discharge.mp. or exp Patient Discharge/ 26639  20. discharge.mp. 167713  21. transitio*.mp. 356801  22. patient transfer.mp. or exp Patient Transfer/ 7897  23. continuity of care.mp. or exp "Continuity of Patient Care"/ 224173  24. patient readmission.mp. or exp Patient Readmission/ 13342  25. community.mp. 479541  26. primary health care.mp. or exp Primary Health Care/ 151489  27. primary care.mp. 99621  28. residential care.mp. 2836  29. ambulatory care.mp. or exp Ambulatory Care/ 73643  30. exp Nursing Homes/ or nursing hom*.mp. 68198  31. home care services.mp. or exp Home Care Services/ 46536  32. long term care.mp. or exp Long-Term Care/ 46111  33. exp General Practice/ or exp General Practitioners/ 78313  34. family practice.mp. or exp Family Practice/ 68226  35. office practice.mp. 1087  36. family doctor.mp. 2593  37. home visit.mp. or exp House Calls/ 4673  38. office visit.mp. or exp Office Visits/ 7994  39. primary physician.mp. 804  40. primary clinician.mp. 56  41. general practitioner.mp. 17817  42. rehabilitation.mp. or exp Rehabilitation/ 380205  43. 26 or 27 or 28 or 29 or 30 or 31 or 32 or 33 or 34 or 35 or 36 or 37 or 38 or 39 or 40 or 41 or 42  1120327  43. 1 or 2 or 3 or 4 or 5 71603  44. 6 or 7 or 8 or 9 or 10 or 11 or 12 or 13 or 14 or 15 or 16 or 17 or 18 119140  45. 19 or 20 or 21 or 22 or 23 or 24 716622  46. 42 and 43 and 44 and 45 532 |
| --- |
